# Supplementary material
Source: publisher figshare collection journal article supplement (https://acs.figshare.com/ndownloader/files/5342308)
Supplement: Supplementary file 1 [file 5342308]

 
data_sad 
 
_audit_creation_method            SHELXL-97 
_chemical_name_systematic 
; 
 ? 
; 
_chemical_name_common             ? 
_chemical_melting_point           ? 
_chemical_formula_moiety          ? 
_chemical_formula_sum 
 'C25 H20 B F5 O Si' 
_chemical_formula_weight          470.31 
 
loop_ 
 _atom_type_symbol 
 _atom_type_description 
 _atom_type_scat_dispersion_real 
 _atom_type_scat_dispersion_imag 
 _atom_type_scat_source 
 'C'  'C'   0.0033   0.0016 
 'International Tables Vol C Tables 4.2.6.8 and 6.1.1.4' 
 'H'  'H'   0.0000   0.0000 
 'International Tables Vol C Tables 4.2.6.8 and 6.1.1.4' 
 'B'  'B'   0.0013   0.0007 
 'International Tables Vol C Tables 4.2.6.8 and 6.1.1.4' 
 'O'  'O'   0.0106   0.0060 
 'International Tables Vol C Tables 4.2.6.8 and 6.1.1.4' 
 'F'  'F'   0.0171   0.0103 
 'International Tables Vol C Tables 4.2.6.8 and 6.1.1.4' 
 'Si'  'Si'   0.0817   0.0704 
 'International Tables Vol C Tables 4.2.6.8 and 6.1.1.4' 
 
_symmetry_cell_setting            triclinic 
_symmetry_space_group_name_H-M    p-1 
 
loop_ 
 _symmetry_equiv_pos_as_xyz 
 'x, y, z' 
 '-x, -y, -z' 
 
_cell_length_a                    9.812(2) 
_cell_length_b                    10.112(2) 
_cell_length_c                    13.009(3) 
_cell_angle_alpha                 110.373(4) 
_cell_angle_beta                  105.230(4) 
_cell_angle_gamma                 101.512(4) 
_cell_volume                      1105.4(4) 
_cell_formula_units_Z             2 
_cell_measurement_temperature     110(2) 
_cell_measurement_reflns_used     ? 
_cell_measurement_theta_min       ? 
_cell_measurement_theta_max       ? 
 
_exptl_crystal_description        block 
_exptl_crystal_colour             red 
_exptl_crystal_size_max           0.23 
_exptl_crystal_size_mid           0.23 
_exptl_crystal_size_min           0.15 
_exptl_crystal_density_meas       ? 
_exptl_crystal_density_diffrn     1.413 
_exptl_crystal_density_method     'not measured' 
_exptl_crystal_F_000              484 
_exptl_absorpt_coefficient_mu     0.164 
_exptl_absorpt_correction_type    multi-scan 
_exptl_absorpt_correction_T_min   0.9632 
_exptl_absorpt_correction_T_max   0.9758 
_exptl_absorpt_process_details    SADABS 
 
_exptl_special_details 
; 
 ? 
; 
 
_diffrn_ambient_temperature       110(2) 
_diffrn_radiation_wavelength      0.71073 
_diffrn_radiation_type            MoK\a 
_diffrn_radiation_source          'fine-focus sealed tube' 
_diffrn_radiation_monochromator   graphite 
_diffrn_measurement_device_type   'CCD area detector' 
_diffrn_measurement_method        'phi and omega scans' 
_diffrn_detector_area_resol_mean  ? 
_diffrn_standards_number          ? 
_diffrn_standards_interval_count  ? 
_diffrn_standards_interval_time   ? 
_diffrn_standards_decay_%         ? 
_diffrn_reflns_number             8873 
_diffrn_reflns_av_R_equivalents   0.0245 
_diffrn_reflns_av_sigmaI/netI     0.0442 
_diffrn_reflns_limit_h_min        -13 
_diffrn_reflns_limit_h_max        8 
_diffrn_reflns_limit_k_min        -13 
_diffrn_reflns_limit_k_max        13 
_diffrn_reflns_limit_l_min        -16 
_diffrn_reflns_limit_l_max        16 
_diffrn_reflns_theta_min          1.79 
_diffrn_reflns_theta_max          28.98 
_reflns_number_total              5204 
_reflns_number_gt                 4315 
_reflns_threshold_expression      >2sigma(I) 
 
_computing_data_collection        'Bruker SMART' 
_computing_cell_refinement        'Bruker SMART' 
_computing_data_reduction         'Bruker SMART' 
_computing_structure_solution     'SHELXS-97 (Sheldrick, 1990)' 
_computing_structure_refinement   'SHELXL-97 (Sheldrick, 1997)' 
_computing_molecular_graphics     'Bruker SHELXTL' 
_computing_publication_material   'Bruker SHELXTL'
 
_refine_special_details 
; 
 Refinement of F^2^ against ALL reflections.  The weighted R-factor wR and 
 goodness of fit S are based on F^2^, conventional R-factors R are based 
 on F, with F set to zero for negative F^2^. The threshold expression of 
 F^2^ > 2sigma(F^2^) is used only for calculating R-factors(gt) etc. and is 
 not relevant to the choice of reflections for refinement.  R-factors based 
 on F^2^ are statistically about twice as large as those based on F, and R- 
 factors based on ALL data will be even larger. 
; 
 
_refine_ls_structure_factor_coef  Fsqd  
_refine_ls_matrix_type            full 
_refine_ls_weighting_scheme       calc  
_refine_ls_weighting_details 
 'calc w=1/[\s^2^(Fo^2^)+(0.1130P)^2^+0.0000P] where P=(Fo^2^+2Fc^2^)/3' 
_atom_sites_solution_primary      direct 
_atom_sites_solution_secondary    difmap 
_atom_sites_solution_hydrogens    geom 
_refine_ls_hydrogen_treatment     constr 
_refine_ls_extinction_method      none 
_refine_ls_extinction_coef        ? 
_refine_ls_number_reflns          5204 
_refine_ls_number_parameters      298 
_refine_ls_number_restraints      0 
_refine_ls_R_factor_all           0.0629 
_refine_ls_R_factor_gt            0.0500 
_refine_ls_wR_factor_ref          0.1576 
_refine_ls_wR_factor_gt           0.1474 
_refine_ls_goodness_of_fit_ref    1.007 
_refine_ls_restrained_S_all       1.007 
_refine_ls_shift/su_max           0.000 
_refine_ls_shift/su_mean          0.000 
 
loop_ 
 _atom_site_label 
 _atom_site_type_symbol 
 _atom_site_fract_x 
 _atom_site_fract_y 
 _atom_site_fract_z 
 _atom_site_U_iso_or_equiv 
 _atom_site_adp_type 
 _atom_site_occupancy 
 _atom_site_symmetry_multiplicity 
 _atom_site_calc_flag 
 _atom_site_refinement_flags 
 _atom_site_disorder_assembly 
 _atom_site_disorder_group 
Si1 Si 0.66349(6) 0.93663(5) 0.14786(4) 0.02125(15) Uani 1 1 d . . . 
F3 F 0.56249(13) 1.42554(12) -0.38185(9) 0.0268(3) Uani 1 1 d . . . 
O1 O 0.76968(14) 1.40885(13) 0.15940(10) 0.0193(3) Uani 1 1 d . . . 
F2 F 0.77732(13) 1.44261(14) -0.25216(11) 0.0387(3) Uani 1 1 d . . . 
F1 F 0.69492(14) 1.03358(14) 0.07632(10) 0.0390(3) Uani 1 1 d . . . 
F4 F 0.55728(15) 1.37579(15) -0.22513(11) 0.0400(3) Uani 1 1 d . . . 
F5 F 0.60668(16) 1.21719(14) -0.37267(13) 0.0472(4) Uani 1 1 d . . . 
C1 C 0.8428(2) 0.95825(18) 0.26093(14) 0.0184(3) Uani 1 1 d . . . 
C12 C 0.86835(19) 1.31730(17) 0.30141(14) 0.0163(3) Uani 1 1 d . . . 
C17 C 0.77767(19) 1.39354(18) 0.26016(14) 0.0168(3) Uani 1 1 d . . . 
C23 C 0.9413(2) 1.27208(17) 0.13056(14) 0.0167(3) Uani 1 1 d . . . 
C20 C 0.8986(2) 1.3024(2) -0.08086(15) 0.0246(4) Uani 1 1 d . . . 
H20A H 0.8847 1.3114 -0.1529 0.030 Uiso 1 1 calc R . . 
C11 C 0.94993(18) 1.25236(17) 0.23444(13) 0.0154(3) Uani 1 1 d . . . 
C9 C 0.99664(19) 1.04661(17) 0.29838(13) 0.0156(3) Uani 1 1 d . . . 
C18 C 0.84768(19) 1.34900(17) 0.09472(14) 0.0171(3) Uani 1 1 d . . . 
C8 C 1.04776(19) 1.17408(18) 0.27602(13) 0.0162(3) Uani 1 1 d . . . 
C19 C 0.8258(2) 1.3650(2) -0.01022(15) 0.0222(4) Uani 1 1 d . . . 
H19A H 0.7621 1.4179 -0.0320 0.027 Uiso 1 1 calc R . . 
C22 C 1.0148(2) 1.20854(19) 0.05416(14) 0.0204(4) Uani 1 1 d . . . 
H22A H 1.0782 1.1547 0.0744 0.025 Uiso 1 1 calc R . . 
C15 C 0.6990(2) 1.44827(18) 0.42391(15) 0.0201(4) Uani 1 1 d . . . 
H15A H 0.6403 1.4903 0.4653 0.024 Uiso 1 1 calc R . . 
C5 C 1.2638(2) 1.07852(19) 0.39105(15) 0.0225(4) Uani 1 1 d . . . 
H5A H 1.3374 1.0482 0.4323 0.027 Uiso 1 1 calc R . . 
C10 C 1.1111(2) 1.00409(18) 0.36021(14) 0.0189(4) Uani 1 1 d . . . 
C16 C 0.6909(2) 1.45675(18) 0.31911(15) 0.0197(4) Uani 1 1 d . . . 
H16A H 0.6279 1.5044 0.2879 0.024 Uiso 1 1 calc R . . 
C14 C 0.7929(2) 1.37818(19) 0.47070(15) 0.0210(4) Uani 1 1 d . . . 
H14A H 0.7989 1.3756 0.5440 0.025 Uiso 1 1 calc R . . 
C7 C 1.1981(2) 1.24183(18) 0.30485(14) 0.0197(4) Uani 1 1 d . . . 
H7A H 1.2284 1.3225 0.2855 0.024 Uiso 1 1 calc R . . 
C6 C 1.3067(2) 1.1938(2) 0.36211(15) 0.0226(4) Uani 1 1 d . . . 
H6A H 1.4095 1.2410 0.3807 0.027 Uiso 1 1 calc R . . 
C13 C 0.8752(2) 1.31400(18) 0.41114(14) 0.0184(3) Uani 1 1 d . . . 
H13A H 0.9377 1.2666 0.4432 0.022 Uiso 1 1 calc R . . 
C2 C 0.8141(2) 0.8475(2) 0.29924(15) 0.0244(4) Uani 1 1 d . . . 
H2A H 0.7130 0.7930 0.2795 0.029 Uiso 1 1 calc R . . 
C21 C 0.9938(2) 1.2251(2) -0.04819(15) 0.0244(4) Uani 1 1 d . . . 
H21A H 1.0442 1.1838 -0.0980 0.029 Uiso 1 1 calc R . . 
C3 C 0.9264(2) 0.8116(2) 0.36564(17) 0.0272(4) Uani 1 1 d . . . 
H3A H 0.9009 0.7366 0.3918 0.033 Uiso 1 1 calc R . . 
C4 C 1.0719(2) 0.88498(19) 0.39228(16) 0.0245(4) Uani 1 1 d . . . 
H4A H 1.1480 0.8565 0.4327 0.029 Uiso 1 1 calc R . . 
C25 C 0.5289(2) 0.9948(2) 0.21385(19) 0.0317(4) Uani 1 1 d . . . 
H25A H 0.4381 0.9816 0.1519 0.048 Uiso 1 1 calc R . . 
H25B H 0.5728 1.1000 0.2699 0.048 Uiso 1 1 calc R . . 
H25C H 0.5039 0.9340 0.2549 0.048 Uiso 1 1 calc R . . 
B1 B 0.6258(2) 1.3646(2) -0.30787(18) 0.0221(4) Uani 1 1 d . . . 
C24 C 0.5877(2) 0.7411(2) 0.03572(17) 0.0348(5) Uani 1 1 d . . . 
H24A H 0.4944 0.7271 -0.0241 0.052 Uiso 1 1 calc R . . 
H24B H 0.5684 0.6743 0.0733 0.052 Uiso 1 1 calc R . . 
H24C H 0.6602 0.7185 -0.0015 0.052 Uiso 1 1 calc R . . 
 
loop_ 
 _atom_site_aniso_label 
 _atom_site_aniso_U_11 
 _atom_site_aniso_U_22 
 _atom_site_aniso_U_33 
 _atom_site_aniso_U_23 
 _atom_site_aniso_U_13 
 _atom_site_aniso_U_12 
Si1 0.0141(3) 0.0258(3) 0.0209(3) 0.0111(2) 0.0036(2) 0.0016(2) 
F3 0.0250(6) 0.0391(6) 0.0266(5) 0.0215(5) 0.0103(5) 0.0161(5) 
O1 0.0187(7) 0.0253(6) 0.0196(6) 0.0131(5) 0.0080(5) 0.0103(5) 
F2 0.0207(7) 0.0475(7) 0.0471(7) 0.0328(6) 0.0005(5) 0.0019(6) 
F1 0.0244(7) 0.0503(7) 0.0301(6) 0.0271(6) -0.0055(5) -0.0104(6) 
F4 0.0452(8) 0.0630(8) 0.0390(7) 0.0367(6) 0.0275(6) 0.0287(7) 
F5 0.0509(10) 0.0278(6) 0.0609(8) 0.0151(6) 0.0181(7) 0.0183(6) 
C1 0.0174(9) 0.0193(8) 0.0171(7) 0.0069(6) 0.0061(7) 0.0046(7) 
C12 0.0150(9) 0.0178(8) 0.0172(7) 0.0084(6) 0.0056(6) 0.0059(7) 
C17 0.0160(9) 0.0180(7) 0.0164(7) 0.0089(6) 0.0048(7) 0.0039(7) 
C23 0.0153(9) 0.0164(7) 0.0163(7) 0.0064(6) 0.0055(6) 0.0025(7) 
C20 0.0266(11) 0.0312(9) 0.0174(8) 0.0127(7) 0.0084(8) 0.0068(8) 
C11 0.0123(8) 0.0142(7) 0.0165(7) 0.0059(6) 0.0035(6) 0.0011(6) 
C9 0.0163(9) 0.0168(7) 0.0140(7) 0.0058(6) 0.0060(6) 0.0065(7) 
C18 0.0147(9) 0.0180(8) 0.0181(7) 0.0078(6) 0.0064(7) 0.0033(7) 
C8 0.0172(9) 0.0182(7) 0.0150(7) 0.0074(6) 0.0069(6) 0.0072(7) 
C19 0.0210(10) 0.0252(8) 0.0217(8) 0.0138(7) 0.0053(7) 0.0062(8) 
C22 0.0208(10) 0.0224(8) 0.0195(8) 0.0088(6) 0.0083(7) 0.0086(7) 
C15 0.0182(9) 0.0203(8) 0.0235(8) 0.0085(7) 0.0108(7) 0.0067(7) 
C5 0.0194(10) 0.0238(8) 0.0234(8) 0.0090(7) 0.0052(7) 0.0103(8) 
C10 0.0188(9) 0.0189(8) 0.0181(7) 0.0071(6) 0.0053(7) 0.0073(7) 
C16 0.0185(9) 0.0191(8) 0.0241(8) 0.0105(6) 0.0079(7) 0.0089(7) 
C14 0.0221(10) 0.0242(8) 0.0183(8) 0.0100(6) 0.0085(7) 0.0072(7) 
C7 0.0180(9) 0.0192(8) 0.0221(8) 0.0087(6) 0.0086(7) 0.0049(7) 
C6 0.0132(9) 0.0265(9) 0.0250(8) 0.0092(7) 0.0054(7) 0.0054(7) 
C13 0.0195(9) 0.0211(8) 0.0178(7) 0.0106(6) 0.0069(7) 0.0083(7) 
C2 0.0215(10) 0.0236(9) 0.0241(8) 0.0107(7) 0.0046(7) 0.0028(7) 
C21 0.0242(10) 0.0289(9) 0.0197(8) 0.0075(7) 0.0111(8) 0.0086(8) 
C3 0.0313(12) 0.0204(8) 0.0313(9) 0.0160(7) 0.0085(8) 0.0058(8) 
C4 0.0251(10) 0.0213(8) 0.0267(9) 0.0121(7) 0.0043(8) 0.0097(8) 
C25 0.0183(10) 0.0314(10) 0.0415(11) 0.0129(9) 0.0079(9) 0.0085(8) 
B1 0.0211(11) 0.0241(9) 0.0254(9) 0.0141(8) 0.0090(8) 0.0089(8) 
C24 0.0219(11) 0.0364(11) 0.0270(9) 0.0005(8) 0.0035(8) 0.0012(9) 
 
_geom_special_details 
; 
 All esds (except the esd in the dihedral angle between two l.s. planes) 
 are estimated using the full covariance matrix.  The cell esds are taken 
 into account individually in the estimation of esds in distances, angles 
 and torsion angles; correlations between esds in cell parameters are only 
 used when they are defined by crystal symmetry.  An approximate (isotropic) 
 treatment of cell esds is used for estimating esds involving l.s. planes. 
; 
 
loop_ 
 _geom_bond_atom_site_label_1 
 _geom_bond_atom_site_label_2 
 _geom_bond_distance 
 _geom_bond_site_symmetry_2 
 _geom_bond_publ_flag 
Si1 F1 1.6086(12) . ? 
Si1 C25 1.839(2) . ? 
Si1 C24 1.850(2) . ? 
Si1 C1 1.8893(19) . ? 
F3 B1 1.394(2) . ? 
O1 C18 1.3523(19) . ? 
O1 C17 1.3566(19) . ? 
F2 B1 1.388(2) . ? 
F1 C11 2.703(2) . ? 
F4 B1 1.396(2) . ? 
F5 B1 1.378(2) . ? 
C1 C2 1.385(2) . ? 
C1 C9 1.445(2) . ? 
C12 C17 1.409(2) . ? 
C12 C11 1.417(2) . ? 
C12 C13 1.424(2) . ? 
C17 C16 1.393(2) . ? 
C23 C18 1.407(2) . ? 
C23 C11 1.417(2) . ? 
C23 C22 1.427(2) . ? 
C20 C19 1.370(3) . ? 
C20 C21 1.406(3) . ? 
C20 H20A 0.9500 . ? 
C11 C8 1.473(2) . ? 
C9 C10 1.432(2) . ? 
C9 C8 1.441(2) . ? 
C18 C19 1.396(2) . ? 
C8 C7 1.383(2) . ? 
C19 H19A 0.9500 . ? 
C22 C21 1.367(2) . ? 
C22 H22A 0.9500 . ? 
C15 C16 1.378(2) . ? 
C15 C14 1.410(2) . ? 
C15 H15A 0.9500 . ? 
C5 C6 1.368(2) . ? 
C5 C10 1.413(3) . ? 
C5 H5A 0.9500 . ? 
C10 C4 1.422(2) . ? 
C16 H16A 0.9500 . ? 
C14 C13 1.364(2) . ? 
C14 H14A 0.9500 . ? 
C7 C6 1.403(2) . ? 
C7 H7A 0.9500 . ? 
C6 H6A 0.9500 . ? 
C13 H13A 0.9500 . ? 
C2 C3 1.404(3) . ? 
C2 H2A 0.9500 . ? 
C21 H21A 0.9500 . ? 
C3 C4 1.359(3) . ? 
C3 H3A 0.9500 . ? 
C4 H4A 0.9500 . ? 
C25 H25A 0.9800 . ? 
C25 H25B 0.9800 . ? 
C25 H25C 0.9800 . ? 
C24 H24A 0.9800 . ? 
C24 H24B 0.9800 . ? 
C24 H24C 0.9800 . ? 
 
loop_ 
 _geom_angle_atom_site_label_1 
 _geom_angle_atom_site_label_2 
 _geom_angle_atom_site_label_3 
 _geom_angle 
 _geom_angle_site_symmetry_1 
 _geom_angle_site_symmetry_3 
 _geom_angle_publ_flag 
F1 Si1 C25 107.75(9) . . ? 
F1 Si1 C24 104.56(9) . . ? 
C25 Si1 C24 112.76(10) . . ? 
F1 Si1 C1 111.01(7) . . ? 
C25 Si1 C1 112.58(9) . . ? 
C24 Si1 C1 107.91(9) . . ? 
C18 O1 C17 120.51(13) . . ? 
Si1 F1 C11 101.41(6) . . ? 
C2 C1 C9 117.45(16) . . ? 
C2 C1 Si1 108.07(13) . . ? 
C9 C1 Si1 133.69(12) . . ? 
C17 C12 C11 119.08(14) . . ? 
C17 C12 C13 117.10(14) . . ? 
C11 C12 C13 123.80(15) . . ? 
O1 C17 C16 116.06(14) . . ? 
O1 C17 C12 121.38(14) . . ? 
C16 C17 C12 122.55(14) . . ? 
C18 C23 C11 119.28(15) . . ? 
C18 C23 C22 117.11(14) . . ? 
C11 C23 C22 123.46(15) . . ? 
C19 C20 C21 120.94(15) . . ? 
C19 C20 H20A 119.5 . . ? 
C21 C20 H20A 119.5 . . ? 
C23 C11 C12 118.30(14) . . ? 
C23 C11 C8 121.13(14) . . ? 
C12 C11 C8 120.48(13) . . ? 
C23 C11 F1 78.23(10) . . ? 
C12 C11 F1 89.79(11) . . ? 
C8 C11 F1 104.71(10) . . ? 
C10 C9 C8 115.70(15) . . ? 
C10 C9 C1 118.66(15) . . ? 
C8 C9 C1 125.61(15) . . ? 
O1 C18 C19 115.81(15) . . ? 
O1 C18 C23 121.39(14) . . ? 
C19 C18 C23 122.78(15) . . ? 
C7 C8 C9 121.11(15) . . ? 
C7 C8 C11 114.62(14) . . ? 
C9 C8 C11 123.92(15) . . ? 
C20 C19 C18 118.17(17) . . ? 
C20 C19 H19A 120.9 . . ? 
C18 C19 H19A 120.9 . . ? 
C21 C22 C23 119.99(16) . . ? 
C21 C22 H22A 120.0 . . ? 
C23 C22 H22A 120.0 . . ? 
C16 C15 C14 121.03(15) . . ? 
C16 C15 H15A 119.5 . . ? 
C14 C15 H15A 119.5 . . ? 
C6 C5 C10 120.66(16) . . ? 
C6 C5 H5A 119.7 . . ? 
C10 C5 H5A 119.7 . . ? 
C5 C10 C4 118.62(16) . . ? 
C5 C10 C9 121.45(15) . . ? 
C4 C10 C9 119.93(16) . . ? 
C15 C16 C17 118.20(15) . . ? 
C15 C16 H16A 120.9 . . ? 
C17 C16 H16A 120.9 . . ? 
C13 C14 C15 120.31(15) . . ? 
C13 C14 H14A 119.8 . . ? 
C15 C14 H14A 119.8 . . ? 
C8 C7 C6 121.31(16) . . ? 
C8 C7 H7A 119.3 . . ? 
C6 C7 H7A 119.3 . . ? 
C5 C6 C7 119.58(17) . . ? 
C5 C6 H6A 120.2 . . ? 
C7 C6 H6A 120.2 . . ? 
C14 C13 C12 120.71(16) . . ? 
C14 C13 H13A 119.6 . . ? 
C12 C13 H13A 119.6 . . ? 
C1 C2 C3 123.45(18) . . ? 
C1 C2 H2A 118.3 . . ? 
C3 C2 H2A 118.3 . . ? 
C22 C21 C20 121.00(16) . . ? 
C22 C21 H21A 119.5 . . ? 
C20 C21 H21A 119.5 . . ? 
C4 C3 C2 119.52(16) . . ? 
C4 C3 H3A 120.2 . . ? 
C2 C3 H3A 120.2 . . ? 
C3 C4 C10 120.53(17) . . ? 
C3 C4 H4A 119.7 . . ? 
C10 C4 H4A 119.7 . . ? 
Si1 C25 H25A 109.5 . . ? 
Si1 C25 H25B 109.5 . . ? 
H25A C25 H25B 109.5 . . ? 
Si1 C25 H25C 109.5 . . ? 
H25A C25 H25C 109.5 . . ? 
H25B C25 H25C 109.5 . . ? 
F5 B1 F2 108.96(16) . . ? 
F5 B1 F3 109.98(16) . . ? 
F2 B1 F3 108.59(15) . . ? 
F5 B1 F4 109.75(16) . . ? 
F2 B1 F4 110.37(16) . . ? 
F3 B1 F4 109.18(15) . . ? 
Si1 C24 H24A 109.5 . . ? 
Si1 C24 H24B 109.5 . . ? 
H24A C24 H24B 109.5 . . ? 
Si1 C24 H24C 109.5 . . ? 
H24A C24 H24C 109.5 . . ? 
H24B C24 H24C 109.5 . . ? 
 
_diffrn_measured_fraction_theta_max    0.887 
_diffrn_reflns_theta_full              28.98 
_diffrn_measured_fraction_theta_full   0.887 
_refine_diff_density_max    0.445 
_refine_diff_density_min   -0.289 
_refine_diff_density_rms    0.058 
